# Supplementary material for: Classification and grading of muscle injuries: a narrative review
Source: PubMed Central journal article supplement — Br J Sports Med. 2014 Nov 13;49(5):306. doi: 10.1136/bjsports-2014-093551 (PMC4387470; doi:10.1136/bjsports-2014-093551), 2014-11-13
Supplement: bjsports-2014-093551-s1.pdf [file bjsports-2014-093551-s1.pdf]

**Supplementary Table One:**

**Chronology of publications pertaining to categorical classification and grading of muscle injury.**

RTP = Return to play ROM = Range of motion MRI = Magnetic Resonance Imaging US = Ultrasound < = Less than > = Greater than DOMS = Delayed onset muscle soreness

| Author                 | Publication                                                                                | Classification / Grading Basis                                                             | Details                                                                                                                                                                                                                                                                                                                                    | Cited Cases |
|------------------------|--------------------------------------------------------------------------------------------|--------------------------------------------------------------------------------------------|--------------------------------------------------------------------------------------------------------------------------------------------------------------------------------------------------------------------------------------------------------------------------------------------------------------------------------------------|-------------|
| <b>Marsh H.(1)</b>     | Clinical lecture on Displacements and Injuries of Muscle and Tendons.                      | <i>Classification based on force application</i>                                           | <b>External Injury</b><br><b>Forcible contraction</b>                                                                                                                                                                                                                                                                                      | 5           |
| <b>Crowley D.(2)</b>   | Suturing of Muscles and Tendons.                                                           | <i>Classification based on Force application and anatomical location of injured tissue</i> | <b>Internal</b> (Secondary to violent exertion)<br><b>External</b> (Secondary to Direct violence)                                                                                                                                                                                                                                          | Nil         |
| <b>Heald C.(3)</b>     | Injuries and Sport.                                                                        | <i>Classification based on anatomical location of injured tissue</i>                       | <b>Traumatic Periostitis</b> of Attachment: Sudden onset pain, at site of attachment;<br><b>Tendon-Muscle Strain:</b> Progressive increase in pain, weakness and discomfort with on-going activity;<br><b>Rupture of Muscle Belly:</b> Sudden onset muscle belly pain, swelling and bruising. Palpable muscle "trough"; Risk of recurrence | Nil         |
| <b>Gilcreest E.(4)</b> | Ruptures and Tears of Muscles and Tendons of the Lower Extremity. Report of Fifteen Cases. | <i>Classification based on aetiology</i>                                                   | 1. <b>Senility</b><br>2. <b>Pathological Changes</b><br>3. <b>Physiologic Predisposition</b><br>4. <b>Occupation</b><br>5. <b>Fatigue</b><br>6. <b>Trauma</b>                                                                                                                                                                              | 15          |

|                                          |                                                                                                                    |                                                                                   |                                                                                                                                               |     |
|------------------------------------------|--------------------------------------------------------------------------------------------------------------------|-----------------------------------------------------------------------------------|-----------------------------------------------------------------------------------------------------------------------------------------------|-----|
| <b>Smart M.(5)</b>                       | The Principles of Treatment of Muscles and Joints by Graduated Muscular Contractions                               | <i>Grading based on clinical appearance</i>                                       | <b>Slight<br/>Severe</b>                                                                                                                      | Nil |
|                                          |                                                                                                                    |                                                                                   |                                                                                                                                               |     |
| <b>McMaster P.(6)</b>                    | Tendon and Muscle Ruptures. Clinical and experimental studies on the causes and location of subcutaneous ruptures. | <i>Classification based on mechanism</i>                                          | <b>Direct<br/>Indirect</b>                                                                                                                    | 6   |
|                                          |                                                                                                                    | <i>Grading based on clinical appearance</i>                                       | <b>Partial (incomplete) rupture<br/>Complete rupture</b>                                                                                      |     |
|                                          |                                                                                                                    |                                                                                   |                                                                                                                                               |     |
| <b>Haldeman K,<br/>Soto-Hall R.(7)</b>   | Injuries to Muscles and Tendons.                                                                                   | <i>Classification based on mechanism</i>                                          | <b>Direct trauma<br/>Indirect trauma<br/>Spontaneous rupture<br/>Dislocation of the tendons<br/>Herniation of a muscle through its sheath</b> | 104 |
|                                          |                                                                                                                    |                                                                                   |                                                                                                                                               |     |
| <b>Lloyd F, Deaver G, Eastwood F.(8)</b> | Safety in Athletics. The Prevention and Treatment of Athletic Injuries                                             | <i>Classification based on mechanism</i>                                          | <b>Direct blow<br/>Indirect Force</b>                                                                                                         | Nil |
|                                          |                                                                                                                    |                                                                                   |                                                                                                                                               |     |
| <b>Thorndike A.(9)</b>                   | Athletic Injuries: Prevention, Diagnosis and Treatment                                                             | <i>Classification based on anatomical location of injured tissue</i>              | <b>Origin<br/>Tendon<br/>Muscle Belly</b>                                                                                                     | 375 |
|                                          |                                                                                                                    | <i>Grading based on clinical appearance</i>                                       | <b>Mild<br/>Severe</b>                                                                                                                        |     |
|                                          |                                                                                                                    |                                                                                   |                                                                                                                                               |     |
| <b>Jarvis W.(10)</b>                     | A Medical Handbook for Athletic and Football Club Trainers                                                         | <i>Classification based on source of force application and presumed pathology</i> | <b>Contusion<br/>Myositis Ossificans<br/>Strain (rupture)</b>                                                                                 | Nil |

|                            |                                                                  |                                                                       |                                                                                                                                              |      |
|----------------------------|------------------------------------------------------------------|-----------------------------------------------------------------------|----------------------------------------------------------------------------------------------------------------------------------------------|------|
| <b>Featherstone D.(11)</b> | Sports Injuries                                                  | <i>Classification based on source of force application</i>            | <b>Internal Force</b><br><b>External Force</b>                                                                                               | 9    |
|                            |                                                                  | <i>Grading based on pathological findings (theoretical)</i>           | <b>Slight</b><br><b>Severe</b>                                                                                                               |      |
| <b>Anzel S. et al.(12)</b> | Disruption of Muscles and Tendons.<br>An Analysis of 1,014 Cases | <i>Classification based on injury mechanism</i>                       | <b>Lacerating Injury</b><br><b>Direct Injury</b><br><b>Stress Injury</b><br><b>Miscellaneous</b>                                             | 1014 |
| <b>Colsen J.(13)</b>       | Strapping and Bandaging for Football Injuries.                   | <i>Grading based on Theoretical pathology</i>                         | <b>Minor</b><br><b>Severe</b>                                                                                                                | Nil  |
| <b>Page E.(14)</b>         | Athletic Injuries and Their Treatment.                           | <i>Classification based on source of force application</i>            | <b>Intrinsic</b><br><b>Extrinsic</b>                                                                                                         | Nil  |
|                            |                                                                  | <i>Classification based upon the location of injury</i>               | <b>Musculo-tendinous tear</b><br><b>Periosteal Tear</b><br><b>Ruptured Tendon</b><br><b>Fascial Sheath Rupture</b><br><b>Muscle Bruising</b> |      |
|                            |                                                                  | <i>Grading based on clinical appearance and theoretical pathology</i> | <b>Mild</b><br><b>Severe</b>                                                                                                                 |      |
| <b>Williams J.(15)</b>     | Sports Medicine                                                  | <i>Classification based on source of force application</i>            | <b>Intrinsic</b><br><b>Extrinsic</b>                                                                                                         | 45   |

|                                         |                                                                                             |                                                                                                             |                                                                                                                                                                                                                                                                                                                                                                                                                                                                                                                                                                                                                                                                                                                                                                                                                                                                                                                                            |     |
|-----------------------------------------|---------------------------------------------------------------------------------------------|-------------------------------------------------------------------------------------------------------------|--------------------------------------------------------------------------------------------------------------------------------------------------------------------------------------------------------------------------------------------------------------------------------------------------------------------------------------------------------------------------------------------------------------------------------------------------------------------------------------------------------------------------------------------------------------------------------------------------------------------------------------------------------------------------------------------------------------------------------------------------------------------------------------------------------------------------------------------------------------------------------------------------------------------------------------------|-----|
|                                         |                                                                                             | <i>Grading based on clinical appearance and theoretical pathology</i>                                       | <b>Pull/Strain/Tear<br/>Complete Rupture</b>                                                                                                                                                                                                                                                                                                                                                                                                                                                                                                                                                                                                                                                                                                                                                                                                                                                                                               |     |
|                                         |                                                                                             |                                                                                                             |                                                                                                                                                                                                                                                                                                                                                                                                                                                                                                                                                                                                                                                                                                                                                                                                                                                                                                                                            |     |
| <b>O'Donoghue D.(16)</b>                | Treatment of Injuries to Athletes                                                           | <i>Classification based on pathological nature of injury</i>                                                | <b>Contusion<br/>Myositis Ossificans<br/>Muscle Strain<br/>Muscle Rupture</b>                                                                                                                                                                                                                                                                                                                                                                                                                                                                                                                                                                                                                                                                                                                                                                                                                                                              |     |
|                                         |                                                                                             | <i>Grading based on clinical appearance, theoretical pathology and management</i>                           | <b>Simple Muscle Strain<br/>Violent Strain / Musculo-tendinous injury</b>                                                                                                                                                                                                                                                                                                                                                                                                                                                                                                                                                                                                                                                                                                                                                                                                                                                                  | Nil |
|                                         |                                                                                             |                                                                                                             |                                                                                                                                                                                                                                                                                                                                                                                                                                                                                                                                                                                                                                                                                                                                                                                                                                                                                                                                            |     |
| <b>Tucker W. &amp; Armstrong J.(17)</b> | Injury in Sport: The Physiology, Prevention and Treatment of Injuries associated with Sport | <i>Classification mixed, based on nature of forces involved, anatomical location and "degree" of injury</i> | <b>Contusion (Superficial or Deep)<br/>Strain of muscle or tendon<br/>Rupture of a few fibres<br/>Partial rupture of muscle or tendon<br/>Avulsion of the tendon origin<br/>Acute tendonitis or tenovaginitis</b>                                                                                                                                                                                                                                                                                                                                                                                                                                                                                                                                                                                                                                                                                                                          | Nil |
|                                         |                                                                                             | <i>Grading based on theoretical pathology</i>                                                               | <b>Strain of muscle or tendon<br/>Rupture of a few fibres<br/>Partial rupture of muscle or tendon</b>                                                                                                                                                                                                                                                                                                                                                                                                                                                                                                                                                                                                                                                                                                                                                                                                                                      |     |
|                                         |                                                                                             |                                                                                                             |                                                                                                                                                                                                                                                                                                                                                                                                                                                                                                                                                                                                                                                                                                                                                                                                                                                                                                                                            |     |
| <b>Rachun A.(18)</b>                    | Standard Nomenclature of Athletic Injuries                                                  | <i>Grading based on clinical appearance and theoretical pathology</i>                                       | <p><b>First Degree Strain</b> (Mild Strain; slightly pulled muscle):<br/>Trauma to musculo-tendinous unit due to excessive force or stretch. Localised pain, aggravated by movement; Minor disability; Mild swelling, ecchymosis, local tenderness; Tendency to recur. Minimal haemorrhage, predominantly inflammation</p> <p><b>Second Degree Strain</b> (Moderate Strain; Moderately pulled muscle):<br/>Mechanism as above. Localised pain, aggravated by movement. Moderate disability; Moderate swelling, ecchymosis, local tenderness. Stretching and tearing of fibres, without complete disruption; tendency to recurrence.</p> <p><b>Third Degree Strain</b> (Severe Strain; Severely pulled muscle):<br/>Mechanism as above. Severe pain, and disability. Severe swelling, ecchymosis, haematoma, palpable defect and loss of muscle function. Muscle or tendon rupture, including musculo-tendon junction or bone avulsion.</p> | Nil |
|                                         |                                                                                             |                                                                                                             |                                                                                                                                                                                                                                                                                                                                                                                                                                                                                                                                                                                                                                                                                                                                                                                                                                                                                                                                            |     |

|                      |                                                                                          |                                                                                                        |                                                                                                                                                                                                                                                                                                                                                                                                                                                                                                                                                               |     |
|----------------------|------------------------------------------------------------------------------------------|--------------------------------------------------------------------------------------------------------|---------------------------------------------------------------------------------------------------------------------------------------------------------------------------------------------------------------------------------------------------------------------------------------------------------------------------------------------------------------------------------------------------------------------------------------------------------------------------------------------------------------------------------------------------------------|-----|
| <b>Bass A.(19)</b>   | Rehabilitation after soft tissue trauma                                                  | <i>Classification based on observed clinical outcome and theoretical pathological nature of injury</i> | <b>Intra-muscular</b><br><b>Extra-muscular</b>                                                                                                                                                                                                                                                                                                                                                                                                                                                                                                                | 72  |
|                      |                                                                                          | <i>Classification based on anatomical location (presumed)</i>                                          | <b>Musculo-periosteal</b><br><b>Musculo-tendinous</b><br><b>Tendon</b><br><b>Tendo-periosteal</b><br><b>Muscular</b>                                                                                                                                                                                                                                                                                                                                                                                                                                          |     |
| <b>Hirata I.(20)</b> | The Doctor and the Athlete                                                               | <i>Classification based on clinical appearance</i>                                                     | <b>Contusion</b><br><b>Strain</b><br><b>Tear ("pull")</b><br><b>Tight (hamstring)</b>                                                                                                                                                                                                                                                                                                                                                                                                                                                                         | Nil |
| <b>Ryan A.(21)</b>   | Quadriceps strain, rupture and charlie horse                                             | <i>Grading based on clinical appearance and theoretical pathology</i>                                  | <b>Grade I:</b> Crushing or tearing of a very small number of muscle cells; small amount of bleeding and localised muscle spasm;<br><b>Grade II:</b> Greater number of muscle cells crushed or torn. Fascia remains intact, with considerable bleeding and haematoma of liquid and blood. More severe pain and spasm with palpable tenderness<br><b>Grade III:</b> Greater muscle involvement, fascia partially torn; considerable bleeding and loss of range of motion;<br><b>Grade IV:</b> Complete rupture; Intense pain and swelling; complete disability | Nil |
| <b>Wise D.(22)</b>   | Physiotherapeutic treatment of athletic injuries to the muscle-tendon complex of the leg | <i>Classification based upon Injury Mechanism</i>                                                      | <b>Contusion</b><br><b>Strain</b>                                                                                                                                                                                                                                                                                                                                                                                                                                                                                                                             | Nil |

|                        |                                                                             |                                                                      |                                                                                                                                                                                                                                                                                                                                                                                                                                                                                                                                                                                                                                                                                                                                                          |     |
|------------------------|-----------------------------------------------------------------------------|----------------------------------------------------------------------|----------------------------------------------------------------------------------------------------------------------------------------------------------------------------------------------------------------------------------------------------------------------------------------------------------------------------------------------------------------------------------------------------------------------------------------------------------------------------------------------------------------------------------------------------------------------------------------------------------------------------------------------------------------------------------------------------------------------------------------------------------|-----|
|                        |                                                                             | <i>Grading based on clinical presentation</i>                        | <p><b>Grade 1:</b> Minimal pain to palpation, well localised; &lt;6mm difference in circumference; full pain free ROM; minimal pain on contraction with no loss of power and only mildly disturbed function.</p> <p><b>Grade 2:</b> Substantial pain to palpation, poorly localised; 6-12mm difference in circumference, develops within 12-24 hours; 50% loss of ROM; considerable pain on contraction with considerable loss of power and greatly disturbed gait.</p> <p><b>Grade 3:</b> Intractable pain to palpation, diffuse; &gt;12mm difference in circumference, develops rapidly within one hour; [more than] 50% loss of ROM; severe pain on contraction with almost total loss of power with flicker contractions and cannot weight bear.</p> |     |
| <b>Tietjen R.(23)</b>  | Closed Injuries of the Pectoralis Major Muscle                              | <i>Classification based on clinical appearance</i>                   | <p><b>Type I: Contusion/Sprain</b><br/> <b>Type II: Partial</b><br/> <b>Type III: Complete</b><br/> <b>IIIa Muscle Origin</b><br/> <b>IIIb Muscle Belly</b><br/> <b>IIIc Musculo-tendinous Junction</b><br/> <b>IIId Tendon</b></p>                                                                                                                                                                                                                                                                                                                                                                                                                                                                                                                      | 3   |
| <b>Oakes B.(24)</b>    | Hamstring muscle injuries                                                   | <i>Grading based on clinical history and appearance</i>              | <p><b>Grade 1:</b> Athlete notices a small moderately painful "pull", but can usually continue activity. Next day "quite sore" or "stiff", able to walk and slow jog up to "3/4 pace" before discomfort. Minimal limitation of straight leg raise.</p> <p><b>Grade 2:</b> "twang" while sprinting and usually has to stop and limp. Aching after warming down and limping. Straight leg raise limited and painful. Tenderness and bruising may appear after 3-6 days, usually distally in popliteal fossa. Pain with active flexion or jogging.</p> <p><b>Grade 3:</b> Near or complete rupture. "Explosion" of pain while sprinting with collapse in pain. Walking not possible, straight leg raise only to low angles still with pain.</p>             | Nil |
| <b>Renstrom P.(25)</b> | Muscle Injuries in Sports. In: Sports Medicine in Track and Field Athletics | <i>Classification based on anatomical location of injured tissue</i> | <ol style="list-style-type: none"> <li>1. Origin Bone/Periosteum</li> <li>2. Muscle</li> <li>3. Musculo-tendinous Junction</li> <li>4. Tendon/Aponeurosis</li> <li>5. Insertion</li> </ol>                                                                                                                                                                                                                                                                                                                                                                                                                                                                                                                                                               | Nil |

|                                            |                                                                         | <i>Grading based on clinical appearance and theoretical pathology</i> | <b>1st Degree Strain;<br/>2nd Degree Strain;<br/>3rd Degree Strain (tear)</b>                                                                                                                                                                                                                                                                                                                                                                                                                            |     |
|--------------------------------------------|-------------------------------------------------------------------------|-----------------------------------------------------------------------|----------------------------------------------------------------------------------------------------------------------------------------------------------------------------------------------------------------------------------------------------------------------------------------------------------------------------------------------------------------------------------------------------------------------------------------------------------------------------------------------------------|-----|
|                                            |                                                                         |                                                                       |                                                                                                                                                                                                                                                                                                                                                                                                                                                                                                          |     |
| <b>Safran M. et al.(26)</b>                | Warm-Up and Muscular Injury Prevention: An Update                       | <i>Classification based on Clinical Presentation</i>                  | <b>Type I:</b> DOMS Muscle soreness that occurs 24-48 hours after unaccustomed vigorous exercise<br><b>Type II:</b> Acute disabling pain from a muscle tear<br><b>Type III:</b> Muscle soreness or cramp that occurs during or immediately after exercise                                                                                                                                                                                                                                                | Nil |
|                                            |                                                                         | <i>Graded based on presumed pathology</i>                             | <b>Grade 1 -4:</b> (As per Ryan 1969)                                                                                                                                                                                                                                                                                                                                                                                                                                                                    |     |
|                                            |                                                                         |                                                                       |                                                                                                                                                                                                                                                                                                                                                                                                                                                                                                          |     |
| <b>De Smet A. et al.(27)</b>               | Magnetic resonance imaging of muscle tears                              | <i>Classification based on injury longevity</i>                       | <b>Acute tear:</b> Injury less than 2 weeks duration<br><b>Subacute Tear:</b> Injury 2-5 months duration<br><b>Chronic Tear:</b> Injury 1-3 years duration                                                                                                                                                                                                                                                                                                                                               | 17  |
|                                            |                                                                         |                                                                       |                                                                                                                                                                                                                                                                                                                                                                                                                                                                                                          |     |
| <b>Peetrons P &amp; Creteur V.(28, 29)</b> | Imagerie Des Parties Molles De L'Appareil                               | <i>Classification based on source of force application</i>            | <b>Intrinsic</b><br><b>Extrinsic</b>                                                                                                                                                                                                                                                                                                                                                                                                                                                                     | Nil |
|                                            |                                                                         | <i>Grading based on ultrasound imaging and clinical appearance</i>    | <b>Grade 0:</b> Sonographically Normal<br><b>Grade I:</b> Hypoechoic area, <15 mm in longest axis; <5% of muscle involved.<br><b>Grade II:</b> 5-50% muscle involvement. Partial Muscle Rupture. Sudden "snap" with intense localised pain. Demonstrable hypo or an-echoic gap, with "bell clapper" sign. Typically 5-6 weeks healing time.<br><b>Grade III:</b> Full thickness tear of muscle or fascia, with extravasation of collection away from injured part of muscle. Associated with severe pain |     |
|                                            |                                                                         |                                                                       |                                                                                                                                                                                                                                                                                                                                                                                                                                                                                                          |     |
| <b>Pomeranz S, Heidt R Jr.(30)</b>         | MR imaging in the prognostication of hamstring injury. Work in progress | <i>Classification based on MRI Findings</i>                           | <b>Anatomical Location</b> (Tendon / Myotendinous / Superficial)<br><b>Presence of Oedema</b><br><b>Haemorrhage</b>                                                                                                                                                                                                                                                                                                                                                                                      | 14  |

|                                  |                                                                           | <i>Grading based on MRI Findings</i>                                                         | Extent of Muscle Involvement                                                                                                                                                                                                                         |    |
|----------------------------------|---------------------------------------------------------------------------|----------------------------------------------------------------------------------------------|------------------------------------------------------------------------------------------------------------------------------------------------------------------------------------------------------------------------------------------------------|----|
|                                  |                                                                           |                                                                                              |                                                                                                                                                                                                                                                      |    |
| <b>Takebayashi S, et al.(31)</b> | Sonographic findings in muscle strain injury: Clinical and MR correlation | <i>Grading based on clinical findings</i>                                                    | <b>Grade One</b> (Mild Degree)<br><b>Grade Two</b> (Moderate Degree)<br><b>Grade Three</b> (Severe Degree)                                                                                                                                           | 57 |
|                                  |                                                                           | <i>Grading based on US findings</i>                                                          | <b>Grade One:</b> Normal<br><b>Grade Two:</b> Hyperechoic infiltration<br><b>Grade Three:</b> Mass observed<br><b>Grade Four:</b> Compound lesion of hyperechoic infiltration and mass                                                               |    |
|                                  |                                                                           | <i>Grading based on US / MRI lesion size</i>                                                 | <b>Small:</b> < 20% cross sectional area<br><b>Moderate:</b> 20-50% cross sectional area<br><b>Large:</b> > 50% cross sectional area                                                                                                                 |    |
|                                  |                                                                           |                                                                                              |                                                                                                                                                                                                                                                      |    |
| <b>Rubin S. et al.(32)</b>       | Magnetic Resonance Imaging of Muscle Injury                               | <i>Classification based on source of force application</i>                                   | <b>Penetrating and blunt trauma</b><br>Lacerations<br>Contusions)<br><b>Exertion related</b><br>Muscle strains<br>Overuse syndromes<br>DOMS                                                                                                          | 8  |
|                                  |                                                                           | <i>Grading based on clinical and MRI appearance</i>                                          | <b>Grade I:</b> Minimal tearing of muscle fibres, without weakness<br><b>Grade II:</b> Partial separation of muscle from tendon or fascia; weakness<br><b>Grade III:</b> Complete separation of musculo-tendinous unit; significant lack of function |    |
|                                  |                                                                           |                                                                                              |                                                                                                                                                                                                                                                      |    |
| <b>Connell D. et al.(33)</b>     | Injuries of the Pectoralis Major Muscle: Evaluation with MR Imaging       | <i>Classification based on MRI findings of anatomical location and surgical confirmation</i> | <b>Tendon-bone interface</b><br><b>Tendon</b><br><b>Musculo-tendinous junction</b><br><b>Muscle</b>                                                                                                                                                  | 15 |
|                                  |                                                                           | <i>Grading based on MRI findings with or without surgical confirmation</i>                   | <b>Partial "Low":</b> < 30% muscle fibres<br><b>Moderate:</b> 30-70% muscle fibres<br><b>High:</b> >70% muscle fibres; Complete                                                                                                                      |    |
|                                  |                                                                           |                                                                                              |                                                                                                                                                                                                                                                      |    |



|                               |                                                                                                                                        |                                                                                      |                                                                                                                                                                                                                                                                                                                                                                                          |     |
|-------------------------------|----------------------------------------------------------------------------------------------------------------------------------------|--------------------------------------------------------------------------------------|------------------------------------------------------------------------------------------------------------------------------------------------------------------------------------------------------------------------------------------------------------------------------------------------------------------------------------------------------------------------------------------|-----|
| <b>De Smet A, Best T.(34)</b> | MR Imaging of the Distribution and Location of Acute Hamstring Injuries in Athletes                                                    | <i>Classification based on MRI findings of anatomical location</i>                   | <b>Muscle involved</b><br><b>Musculo-tendinous Junction</b><br><b>Proximal</b><br><b>Proximal intra-muscular</b><br><b>Distal intra-muscular</b><br><b>Distal</b>                                                                                                                                                                                                                        | 15  |
|                               |                                                                                                                                        |                                                                                      |                                                                                                                                                                                                                                                                                                                                                                                          |     |
| <b>Jarvinen T, et al.(35)</b> | Muscle Strain Injuries                                                                                                                 | <i>Classification based on pathological (imaging) nature of haematoma collection</i> | <b>1. Intra-muscular Haematoma:</b> Intact muscle fascia limits the size of the haematoma. Pain (due to increased pressure) and loss of function;<br><b>2. Inter-muscular Haematoma:</b> Rupture of the muscle fascia, with blood spreading to inter-muscular spaces. Not as much pain as intra-muscular.                                                                                | Nil |
|                               |                                                                                                                                        | <i>Grading based on clinical appearance and theoretical pathology</i>                | <b>Mild (first degree) strain:</b> Tear of a few muscle fibres; minor swelling and discomfort, with no or minimal loss of strength and restriction of movements.<br><b>Moderate (second degree) strain:</b> Greater damage of muscle with a clear loss of strength.<br><b>Severe (third degree) strain:</b> Tear extending across the whole muscle belly, with a total loss of function. |     |
|                               |                                                                                                                                        |                                                                                      |                                                                                                                                                                                                                                                                                                                                                                                          |     |
| <b>Carrino J, et al.(36)</b>  | Pectoralis major muscle and tendon tears: diagnosis and grading using MRI                                                              | <i>Classification based on Radiological appearance</i>                               | <b>Subacute:</b> Presence of oedema or haemorrhage (at the enthesis or myotendinous junction), reflecting intra- or extra- cellular methemoglobin.<br><b>Chronic:</b> Absence of a substantial amount of oedema and/or haemorrhage, or muscle atrophy present.                                                                                                                           | 10  |
|                               |                                                                                                                                        | <i>Grading based on radiological findings and Surgical outcome</i>                   | <b>Partial Tear:</b> Fluid or haemorrhage at the interface (enthesis or myotendinous junction) but without substantial retraction or complete discontinuity<br><b>Complete Tear:</b> Discontinuity with or without retraction of either the tendon at the enthesis or the muscle at the myotendinous junction.                                                                           |     |
|                               |                                                                                                                                        |                                                                                      |                                                                                                                                                                                                                                                                                                                                                                                          |     |
| <b>Verrall G, et al.(37)</b>  | Clinical risk factors for hamstring muscle strain injury: a prospective study with correlation of injury by magnetic resonance imaging | <i>Classification based on MRI findings</i>                                          | <b>MRI Positive</b><br><b>MRI Negative</b>                                                                                                                                                                                                                                                                                                                                               | 32  |
|                               |                                                                                                                                        |                                                                                      |                                                                                                                                                                                                                                                                                                                                                                                          |     |

|                                |                                                                                                                                          |                                                        |                                                                                                                                                                                                                                                                                                                                                                                           |     |
|--------------------------------|------------------------------------------------------------------------------------------------------------------------------------------|--------------------------------------------------------|-------------------------------------------------------------------------------------------------------------------------------------------------------------------------------------------------------------------------------------------------------------------------------------------------------------------------------------------------------------------------------------------|-----|
| Slavotinek J, et al.(38)       | Hamstring Injury in Athletes: Using MR Imaging Measurements to Compare Extent of Muscle Injury with Amount of Time Lost from Competition | Classification based on MRI findings                   | MRI Positive<br>MRI Negative                                                                                                                                                                                                                                                                                                                                                              | 37  |
|                                |                                                                                                                                          | Classification based on MRI location                   | Proximal Hamstring<br>Distal Hamstring                                                                                                                                                                                                                                                                                                                                                    |     |
|                                |                                                                                                                                          | Grading based on MRI findings                          | < 50% muscle involved<br>> 50% muscle involved                                                                                                                                                                                                                                                                                                                                            |     |
| Verrall G, et al.(39)          | Diagnostic and prognostic value of clinical findings in 83 athletes with posterior thigh injury                                          | Classification based on clinical location of injury    | Upper<br>Middle<br>Lower (third of hamstring)                                                                                                                                                                                                                                                                                                                                             | 83  |
|                                |                                                                                                                                          | Classification based on MRI findings                   | MRI Positive<br>MRI Negative                                                                                                                                                                                                                                                                                                                                                              |     |
| Stoller D, et al.(40)          | Diagnostic Imaging Orthopaedics                                                                                                          | Grading based on clinical findings, US and MRI Imaging | <b>Rectus Femoris:</b><br><b>First-degree:</b> small area muscle involved without loss of function<br><b>Second-degree:</b> partial tear musculo-tendinous unit +/- mass or hematoma<br><b>Third-degree:</b> complete tear musculo-tendinous unit +/- mass or palpable defect +/- retraction of mass or detached muscle segment<br><b>3B</b> = avulsion fracture from origin or insertion | Nil |
| Blankenbaker D, De Smet A.(41) | MR Imaging of muscle injuries                                                                                                            | Classification based on source of force application    | <b>Direct</b><br>Contusion<br>Laceration)<br><b>Indirect</b><br>strain / tear                                                                                                                                                                                                                                                                                                             | Nil |

|                                   |                                                                                                      |                                                                          |                                                                                                                                                                                                                                                                                                                                                                                                                                                                                                                                                                                                                                                                                                                                                                  |     |
|-----------------------------------|------------------------------------------------------------------------------------------------------|--------------------------------------------------------------------------|------------------------------------------------------------------------------------------------------------------------------------------------------------------------------------------------------------------------------------------------------------------------------------------------------------------------------------------------------------------------------------------------------------------------------------------------------------------------------------------------------------------------------------------------------------------------------------------------------------------------------------------------------------------------------------------------------------------------------------------------------------------|-----|
|                                   |                                                                                                      | <i>Grade based on clinical and MRI appearance</i>                        | <p><b>Grade 1:</b> Minor degree of microscopic tearing with no permanent defect; MRI: Intramuscular high signal on T2 images without disruption of muscle fibers; peri-fascial fluid tracking along the inter-muscular region.</p> <p><b>Grade 2:</b> Partial tear; Incomplete disruption of muscle fibres MRI: myotendinous junction partially torn. Tendon fibres irregular and thinned with mild laxity. Muscle oedema and hemorrhage with extension along the fascial planes between muscle groups. Haematoma at myotendinous junction.</p> <p><b>Grade 3:</b> Complete rupture of muscle with loss of muscle function, retraction, spasm, shortening of muscle. MRI: Complete disruption of the myotendinous junction. Extensive oedema and hemorrhage.</p> |     |
|                                   |                                                                                                      |                                                                          |                                                                                                                                                                                                                                                                                                                                                                                                                                                                                                                                                                                                                                                                                                                                                                  |     |
| <b>Lee J. &amp; Healey J.(42)</b> | Sonography of lower limb muscle injury                                                               | <i>Classification based on injury mechanism and underlying pathology</i> | <p><b>Contusion</b></p> <p><b>Strain</b></p> <p><b>Delayed onset muscle soreness</b></p> <p><b>Muscle Hernia</b></p> <p><b>Myositis Ossificans</b></p>                                                                                                                                                                                                                                                                                                                                                                                                                                                                                                                                                                                                           | Nil |
|                                   |                                                                                                      | <i>Grading based on clinical and US image findings</i>                   | <p><b>Grade I Muscle Strain:</b> Stiffness, soreness. US: Normal, or focal/general areas of increased echogenicity. +/- peri-fascial fluid. Low risk of tear extension; "heal" within 2 weeks</p> <p><b>Grade II Muscle Strain:</b> Intra-substance tears; Pain, loss of function. US: Discontinuity of muscle fibres in echogenic perimysial striae. Hypervascularity around disrupted muscle fibres. Intramuscular fluid collection. Partial detachment of adjacent fascia or aponeurosis. Risk of extension of injury. Recovery approximately 4 weeks.</p> <p><b>Grade III Muscle Strain:</b> US: Complete myotendinous or tendo-osseous avulsion. Complete discontinuity of muscle fibres and associated haematoma. "Clapper in Bell" sign.</p>              |     |
| <b>Connell D, et al.(43)</b>      | Longitudinal Study Comparing Sonographic and MRI Assessments of Acute and Healing Hamstring Injuries | <i>Classification based on MRI findings</i>                              | <p><b>MRI Positive</b></p> <p><b>MRI Negative</b></p>                                                                                                                                                                                                                                                                                                                                                                                                                                                                                                                                                                                                                                                                                                            | 60  |
|                                   |                                                                                                      | <i>Classification based on MRI anatomical diagnosis</i>                  | <p><b>Muscle with most involvement</b></p> <p><b>More than one muscle</b></p> <p><b>Musculo-tendinous junction</b></p> <p><b>Myofascial</b></p>                                                                                                                                                                                                                                                                                                                                                                                                                                                                                                                                                                                                                  |     |

|                            |                                                                                                                                                                   |                                                                          |                                                                                                                                                                                                                   |    |
|----------------------------|-------------------------------------------------------------------------------------------------------------------------------------------------------------------|--------------------------------------------------------------------------|-------------------------------------------------------------------------------------------------------------------------------------------------------------------------------------------------------------------|----|
|                            |                                                                                                                                                                   |                                                                          | <b>Tendon at bone</b>                                                                                                                                                                                             |    |
|                            |                                                                                                                                                                   | <i>Graded based on inter-muscular haematoma</i>                          | <b>Inter-muscular haematoma:</b><br><b>Absent</b><br><b>Mild</b> (< 2cm <sup>2</sup> )<br><b>Moderate</b> (<6 cm <sup>2</sup> )<br><b>Large</b> (>6 cm <sup>2</sup> )<br><b>Absorbed</b>                          |    |
|                            |                                                                                                                                                                   |                                                                          |                                                                                                                                                                                                                   |    |
| <b>Gibbs N, et al.(44)</b> | The accuracy of MRI in predicting recovery and recurrence of acute grade one hamstring muscle strains within the same season in Australian Rules Football players | <i>Classification based on MRI findings</i>                              | <b>MRI Positive;</b><br><b>MRI Negative</b>                                                                                                                                                                       | 31 |
|                            |                                                                                                                                                                   | <i>Classification based on MRI determined number of muscles involved</i> | <b>Single muscle</b><br><b>More than one muscle</b>                                                                                                                                                               |    |
|                            |                                                                                                                                                                   | <i>Grading based on clinical findings</i>                                | <b>Grade One:</b> Sudden onset pain posterior thigh; localised tenderness in hamstring; localised pain on straight leg raise; pain with resisted prone knee flexion; no loss of continuity, bruising or swelling. |    |
|                            |                                                                                                                                                                   |                                                                          |                                                                                                                                                                                                                   |    |
| <b>Cross T. et al.(45)</b> | Acute Quadriceps Muscle Strains: Magnetic Resonance Imaging Features and Prognosis                                                                                | <i>Classification based on MRI anatomical findings</i>                   | <b>Location One:</b> Proximal / Middle<br><b>Location Two:</b> Rectus Femoris Central Tendon / Rectus Femoris Peripheral / Vasti                                                                                  | 60 |
|                            |                                                                                                                                                                   | <i>Grading based on MRI Size</i>                                         | <b>Length of injury</b><br>1-7 cm<br>8-12 cm<br>≥ 13 cm)<br><b>Cross-sectional area</b><br>1-14%<br>15-24%<br>≥25%)                                                                                               |    |
|                            |                                                                                                                                                                   |                                                                          |                                                                                                                                                                                                                   |    |

|                                       |                                                                                                      |                                                                                              |                                                                                                                                                                                                                            |    |
|---------------------------------------|------------------------------------------------------------------------------------------------------|----------------------------------------------------------------------------------------------|----------------------------------------------------------------------------------------------------------------------------------------------------------------------------------------------------------------------------|----|
| <b>Rehman A, Robinson P.(46)</b>      | Sonographic evaluation of injuries to the Pectoralis Muscles                                         | <i>Classification based on US Imaging determined anatomical location</i>                     | <b>Origin</b><br><b>Peripheral</b> (aponeurotic)<br><b>Myotendinous Junction</b><br><b>Enthesis</b>                                                                                                                        | 5  |
|                                       |                                                                                                      | <i>Graded based on extent of imaging determined muscle involvement</i>                       | <b>Grade 1:</b> < 5% of muscle involved<br><b>Grade 2</b> (partial tear): > 5% of muscle involved;<br><b>Grade 3:</b> Complete tear                                                                                        |    |
|                                       |                                                                                                      |                                                                                              |                                                                                                                                                                                                                            |    |
| <b>Askling C, et al.(47-50)</b>       | Type of acute hamstring strain affects flexibility, strength, and time to return to pre-injury level | <i>Classification based on MRI determined injury location (hamstring)</i>                    | <b>Proximal Tendon</b><br><b>Proximal muscle tendon junction</b><br><b>Proximal muscle belly</b><br><b>Distal muscle tendon junction</b><br><b>Distal muscle belly</b><br><b>Distal Tendon</b>                             | 63 |
|                                       | Acute First-Time Hamstring Strains During High-Speed Running                                         | <i>Classification (and prognostic grading) based on mechanism of injury and MRI findings</i> | <b>Stretching type</b><br><b>High speed running type</b>                                                                                                                                                                   |    |
|                                       | Acute First-Time Hamstring Strains During Slow-Speed Stretching                                      |                                                                                              |                                                                                                                                                                                                                            |    |
|                                       | Proximal Hamstring Strains of Stretching Type in Different Sport                                     |                                                                                              |                                                                                                                                                                                                                            |    |
|                                       |                                                                                                      |                                                                                              |                                                                                                                                                                                                                            |    |
| <b>Schneider-Kolsky M, et al.(51)</b> | A Comparison Between Clinical Assessment and Magnetic Resonance Imaging of Acute Hamstring Injuries  | <i>Classification based on imaging diagnosed site of injury</i>                              | <b>Biceps</b><br><b>Not biceps</b>                                                                                                                                                                                         | 58 |
|                                       |                                                                                                      | <i>Grade based on clinical findings</i>                                                      | <b>Grade One:</b><br>i) No Pain / < 10 degrees ROM deficit<br>ii) Mild Pain / < 10 degrees ROM deficit<br><b>Grade Two:</b><br>i) Moderate pain / 10-25 degrees ROM deficit<br>ii) Moderate pain / >25 degrees ROM deficit |    |

|                                  |                                                                                                                                   |                                                                                            |                                                                                                                                                                                                                                                                                                                                                                                           |    |
|----------------------------------|-----------------------------------------------------------------------------------------------------------------------------------|--------------------------------------------------------------------------------------------|-------------------------------------------------------------------------------------------------------------------------------------------------------------------------------------------------------------------------------------------------------------------------------------------------------------------------------------------------------------------------------------------|----|
|                                  |                                                                                                                                   |                                                                                            | <b>Grade Three:</b><br>Severe pain / >25 degrees ROM deficit +/- palpable gap                                                                                                                                                                                                                                                                                                             |    |
|                                  |                                                                                                                                   | <i>Grade based on MRI Lesion Size</i>                                                      | <b>Length coronal view</b><br>No injury<br>< 60mm <<br><b>Diameter axial view</b><br>No injury<br>< 10% <                                                                                                                                                                                                                                                                                 |    |
|                                  |                                                                                                                                   |                                                                                            |                                                                                                                                                                                                                                                                                                                                                                                           |    |
| <b>Verrall G, et al.(52)</b>     | Assessment of Physical Examination and Magnetic Resonance Imaging Findings of Hamstring Injury as Predictors for Recurrent Injury | <i>Grade based on MRI Lesion Size</i>                                                      | <b>MRI transverse size</b><br>Greater or less than 55%<br><b>MRI volume</b><br>Greater or less than 21 cm <sup>3</sup>                                                                                                                                                                                                                                                                    | 37 |
|                                  |                                                                                                                                   |                                                                                            |                                                                                                                                                                                                                                                                                                                                                                                           |    |
| <b>Maquirriain J, et al.(53)</b> | Rectus Abdominus Strains in Tennis Players                                                                                        | <i>Grading (Rectus Abdominus) based on Clinical appearance</i>                             | <b>Slight to mild:</b> No pain with sit up or isometric Valsalva<br><b>Moderate:</b> Painful trunk "sit-up" motion<br><b>Severe:</b> Painful isometric contraction (Valsalva) and simple overhead reaching                                                                                                                                                                                | 21 |
|                                  |                                                                                                                                   |                                                                                            |                                                                                                                                                                                                                                                                                                                                                                                           |    |
| <b>Koulouris G, et al.(54)</b>   | MRI parameters for assessing risk of recurrent hamstring injuries in elite athletes                                               | <i>Grading based on MRI lesion size</i>                                                    | <b>Injury length</b><br><60 cm<br>>60cm                                                                                                                                                                                                                                                                                                                                                   | 31 |
|                                  |                                                                                                                                   |                                                                                            |                                                                                                                                                                                                                                                                                                                                                                                           |    |
| <b>Wood D, et al.(55)</b>        | Avulsion of the proximal hamstring origin                                                                                         | <i>Classification (Hamstring Origin Injury) based upon anatomical location and imaging</i> | <b>Type 1:</b> Osseous avulsions<br><b>Type 2:</b> Avulsion at the musculo-tendinous junction<br><b>Type 3:</b> Incomplete tendon avulsions from the bone<br><b>Type 4:</b> Complete tendon avulsions with little or no retraction<br><b>Type 5:</b> Complete tendon avulsions with retraction<br><b>Type 5a:</b> No Sciatic nerve involvement<br><b>Type 5b:</b> Sciatic nerve tethering | 72 |
|                                  |                                                                                                                                   |                                                                                            |                                                                                                                                                                                                                                                                                                                                                                                           |    |

|                                  |                                                                                                               |                                                                                     |                                                                                                                                                                                                                                                                                                                                                                                                                                                                                                                                                                                                                                  |     |
|----------------------------------|---------------------------------------------------------------------------------------------------------------|-------------------------------------------------------------------------------------|----------------------------------------------------------------------------------------------------------------------------------------------------------------------------------------------------------------------------------------------------------------------------------------------------------------------------------------------------------------------------------------------------------------------------------------------------------------------------------------------------------------------------------------------------------------------------------------------------------------------------------|-----|
| <b>Gyftopoulos S, et al.(56)</b> | Normal Anatomy and Strains of the Deep Musculotendinous Junction of the Proximal Rectus Femoris: MRI Features | <i>Grading based upon MRI findings</i>                                              | <p><b>Grade I Tear:</b> Focal or diffuse high signal intensity at the musculo-tendinous junction. Feathery appearance to the muscle on all pulse sequences. Musculo-tendinous junction intact.</p> <p><b>Grade II Tear:</b> Partial disruption of the musculo-tendinous junction with interstitial feathery high signal or hematoma. Low signal in chronic or old injuries</p> <p><b>Grade III Tear:</b> Complete musculo-tendinous disruption with or without retraction.</p>                                                                                                                                                   | 20  |
| <b>Guerrero M, et al.(57)</b>    | Fast and slow myosins as markers of muscle injury                                                             | <i>Grading based upon clinical findings</i>                                         | <p><b>Grade I:</b> Delayed onset muscle soreness and elongation, very small muscle tear.</p> <p><b>Grade II:</b> Fibrillar disruption, moderate muscle tear.</p> <p><b>Grade III:</b> Fibre disruption, evident muscle tear.</p>                                                                                                                                                                                                                                                                                                                                                                                                 |     |
|                                  |                                                                                                               | <i>Grading based upon MRI/US findings</i>                                           | <p><b>Grade I:</b><br/>US: Haematic suffusion and defect of some fibres 2-3 days after injury.<br/>MRI: Oedema from initial injury.</p> <p><b>Grade II:</b> Oedema and fibrillar defects; <b>Grade III:</b> Greater defect associated with haematoma.</p>                                                                                                                                                                                                                                                                                                                                                                        | 36  |
| <b>Balius R, et al.(58)</b>      | Central aponeurosis tears of the rectus femoris: practical sonographic prognosis                              | <i>Grading based on US findings</i>                                                 | <p><b>Modified Peetrons US Grades I-III</b><br/>No grade 0 and grade III injuries excluded.</p> <p><b>Proximal</b></p> <p><b>Distal</b></p>                                                                                                                                                                                                                                                                                                                                                                                                                                                                                      | 35  |
| <b>Hancock C, et al.(59)</b>     | Flexor femoris muscle complex: grading systems used to describe the complete spectrum of injury               | <i>Grading based on clinical appearance, MRI findings and theoretical pathology</i> | <p><b>Grade I Muscle Strain:</b> Microscopic tears of muscle fibres most commonly at the musculo-tendinous junction, more often proximally. Feathery appearance on fluid sensitive MR sequences. Typically heal well with RICE [rest, ice, compression, elevation].</p> <p><b>Grade II Partial muscle tear:</b> Partial macroscopic muscle fibre disruption. Focal fluid signal intensity collections within the muscle. Weeks to months to heal.</p> <p><b>Grade III Complete muscle tear:</b> Disruption of the myotendinous unit, with retraction and a gap between the torn ends. Surgical intervention may be required.</p> | Nil |

|                  |                                                                                                  |                                                                                     |                                                                                                                                                                                                                                                                                                                                                                                                                                                                                                                                                                                                                                                                                                                                                                                                                                                                           |     |
|------------------|--------------------------------------------------------------------------------------------------|-------------------------------------------------------------------------------------|---------------------------------------------------------------------------------------------------------------------------------------------------------------------------------------------------------------------------------------------------------------------------------------------------------------------------------------------------------------------------------------------------------------------------------------------------------------------------------------------------------------------------------------------------------------------------------------------------------------------------------------------------------------------------------------------------------------------------------------------------------------------------------------------------------------------------------------------------------------------------|-----|
| Dixon J.(60)     | Gastrocnemius vs. soleus strain: how to differentiate and deal with calf muscle injuries         | <i>Grading based on clinical appearance, MRI findings and theoretical pathology</i> | <p><b>Grade 1 / 1st Degree/Mild:</b> Sharp pain at time of injury or pain with activity; Usually able to continue activity; Mild pain and localized tenderness. No or minimal loss of strength and ROM. Mild Spasm and swelling; &lt;10% muscle fibre disruption; Bright signal on fluid-sensitive sequences. Feathery appearance,</p> <p><b>Grade 2 / 2nd Degree / Moderate:</b> Unable to continue activity; clear loss of strength and ROM; &gt;10-50% disruption of muscle fibres; Oedema and haemorrhage.</p> <p><b>Grade 3 / 3rd Degree / Severe:</b> Immediate severe pain, disability; Complete loss of muscle function. Palpable defect or mass. Possible positive "thompsons" test (for calf); 5-100% disruption of muscle fibres; Complete disruption and discontinuity of muscle. Extensive edema and haemorrhage. Wavy tendon morphology and retraction.</p> | Nil |
|                  |                                                                                                  |                                                                                     |                                                                                                                                                                                                                                                                                                                                                                                                                                                                                                                                                                                                                                                                                                                                                                                                                                                                           |     |
| Rodas et al.(61) | Clinical Practice Guide for muscular injuries. Epidemiology, diagnosis, treatment and prevention | <i>Classification based on injury mechanism and underlying pathology</i>            | <p><b>Extrinsic:</b> Contusion/laceration<br/>Light/benign (grade I);<br/>Moderate (grade II);<br/>Serious (grade III));</p> <p><b>Intrinsic</b></p>                                                                                                                                                                                                                                                                                                                                                                                                                                                                                                                                                                                                                                                                                                                      | 175 |
|                  |                                                                                                  | <i>Grading based on presumed histopathology</i>                                     | <p><b>Grade 0 (Contraction and / or DOMS):</b> Functional alteration; elevation of enzymes. Adaptive.</p> <p><b>Grade I (Small fibrillar strain and / or muscular elongation):</b> Alterations of few fibres and connective tissue.</p> <p><b>Grade II (fibrillar strain):</b> More affected fibres and connective tissue, with haematoma.</p> <p><b>Grade III (Muscular strain):</b> Major strain or complete displacement. Loss of function.</p>                                                                                                                                                                                                                                                                                                                                                                                                                        |     |
|                  |                                                                                                  | <i>Grading based on ultrasound findings</i>                                         | <p><b>Grade 0 (Contraction and / or DOMS):</b> Inconsistent. Oedema between fibres and myofascial; increased vascularity.</p> <p><b>Grade I (Small fibrillar strain and / or muscular elongation):</b> Minimal discontinuity, oedema between inter-fascial fibres and fluid.</p> <p><b>Grade II (Fibrillar strain):</b> Clear defect. Inter-fascial fluid and haematoma.</p> <p><b>Grade III (Muscular strain):</b> Complete muscular disruption with retraction.</p>                                                                                                                                                                                                                                                                                                                                                                                                     |     |



|                                         |                                                                                                                 |                                                                                |                                                                                                                                                                                                                                                                                                                                                                                                                                                            |     |
|-----------------------------------------|-----------------------------------------------------------------------------------------------------------------|--------------------------------------------------------------------------------|------------------------------------------------------------------------------------------------------------------------------------------------------------------------------------------------------------------------------------------------------------------------------------------------------------------------------------------------------------------------------------------------------------------------------------------------------------|-----|
|                                         |                                                                                                                 | <i>Grading based on MRI findings</i>                                           | <p><b>Grade 0 (Contraction and / or DOMS):</b> Interstitial and inter-muscular oedema.</p> <p><b>Grade I (Small fibrillar strain and / or muscular elongation):</b> Increased interstitial and inter-muscular signal.</p> <p><b>Grade II (fibrillar strain):</b> Strong signal, focal muscular defect, increase in the signal surrounding the tendon.</p> <p><b>Grade III (Muscular strain):</b> Complete muscle and/or tendon strain with retraction.</p> |     |
|                                         |                                                                                                                 |                                                                                |                                                                                                                                                                                                                                                                                                                                                                                                                                                            |     |
| <b>Malliaropoulos N, et al.(62, 63)</b> | Posterior Thigh Muscle Injuries in Elite Track and Field Athletes                                               | <i>Classified according to muscle and location</i>                             | <p><b>Proximal tendon</b></p> <p><b>Musculo-tendinous junction</b></p> <p><b>Myofascial</b></p> <p><b>Distal tendon</b></p>                                                                                                                                                                                                                                                                                                                                | 165 |
|                                         | Re-injury After Acute Posterior Thigh Muscle Injuries in Elite Track and Field Athletes                         | <i>Grading based on US appearance (as per Peetrans 2002)</i>                   | <p><b>Grade 0:</b> Normal US appearance.</p> <p><b>Grade 1:</b> Subtle US findings, ill-defined hyperechoic or hypoechoic intramuscular area or a swollen aponeurosis.</p> <p><b>Grade 2:</b> Partial muscle tear.</p> <p><b>Grade 3:</b> Complete muscle tear.</p>                                                                                                                                                                                        |     |
|                                         |                                                                                                                 | <i>Grading based on Clinical Examination</i>                                   | <p><b>Active Range of Motion (AROM) Deficit</b></p> <p><b>Grade 1:</b> Deficit &lt; 10 degrees</p> <p><b>Grade 2:</b> Deficit 10-19 degrees</p> <p><b>Grade 3:</b> Deficit 20-29 degrees</p> <p><b>Grade 4:</b> Deficit &gt;30 degrees</p>                                                                                                                                                                                                                 |     |
|                                         |                                                                                                                 |                                                                                |                                                                                                                                                                                                                                                                                                                                                                                                                                                            |     |
| <b>Cohen S, et al.(64)</b>              | Hamstring Injuries in Professional Football Players: Magnetic Resonance Imaging Correlation With Return To Play | <i>Grading (Sum of points, 1-3 points per finding) based on MRI Appearance</i> | <p><b>Number of muscles involved</b></p> <p>0 = 0 muscles</p> <p>1 = 1 muscle</p> <p>2 = 2 muscles;</p> <p>3 = 3 muscles</p> <p><b>Location</b></p> <p>1 = Proximal</p> <p>2 = middle</p> <p>3 = distal</p> <p><b>Insertion</b></p> <p>Yes = 2</p> <p>No = 0)</p> <p><b>Cross sectional percentage of muscle or tendon involvement</b></p> <p>0 = 0%</p> <p>1 = 25%</p>                                                                                    | 43  |

|                               |                                                                                                         |                                                                                   |                                                                                                                                                                                                                                                                                                                                                                                          |     |
|-------------------------------|---------------------------------------------------------------------------------------------------------|-----------------------------------------------------------------------------------|------------------------------------------------------------------------------------------------------------------------------------------------------------------------------------------------------------------------------------------------------------------------------------------------------------------------------------------------------------------------------------------|-----|
|                               |                                                                                                         |                                                                                   | <p>2 = 50%</p> <p>3 = ≥75%</p> <p><b>Retraction</b></p> <p>0 = no retraction</p> <p>1 = &lt; 2cm retraction</p> <p>2 = &gt; 2cm retraction</p> <p><b>Longitudinal axis involvement</b></p> <p>0 = 0 cm</p> <p>1 = 1-5 cm</p> <p>2 = 6-10 cm</p> <p>3 = &gt; 10cm)</p>                                                                                                                    |     |
|                               |                                                                                                         | <i>Grading (traditional) based on MRI appearance</i>                              | <p><b>Grade I:</b> T2 hyper-intense signal about a tendon or muscle without visible disruption of fibres</p> <p><b>Grade II:</b> T2 hyper-intense signal around and within a tendon or muscle with fibre disruption spanning less than half the tendon or muscle width</p> <p><b>Grade III:</b> Disruption of muscle or tendon fibres over more than half the muscle or tendon width</p> |     |
| <b>Ekstrand J, et al.(65)</b> | Hamstring muscle injuries in professional football: the correlation of MRI findings with return to play | <i>Grading based on MRI appearance</i>                                            | <p><b>Grade 0:</b> Negative MRI without any visible pathology</p> <p><b>Grade 1:</b> Oedema but no architectural distortion</p> <p><b>Grade 2:</b> Architectural disruption indicating partial tear</p> <p><b>Grade 3:</b> Total muscle or tendon rupture</p>                                                                                                                            | 207 |
| <b>Comin J, et al.(66)</b>    | Return to Competitive Play After Hamstring Injuries Involving Disruption of the Central Tendon          | <i>Classification based on MRI determined tendon involvement (Hamstring only)</i> | <b>Central tendon disruption Central tendon intact</b>                                                                                                                                                                                                                                                                                                                                   | 62  |
| <b>Chan O, et al.(67)</b>     | Acute muscle strain injuries: a proposed new classification system                                      | <i>Classified based on MRI determined anatomical location</i>                     | <p><b>Proximal MTJ</b></p> <p><b>Muscle</b></p> <p>a) proximal</p> <p>b) middle</p> <p>c) distal</p> <p><b>Distal MTJ</b></p>                                                                                                                                                                                                                                                            | Nil |
|                               |                                                                                                         | <i>Sub-classified based on anatomical structures</i>                              | <p>a. Intra-muscular</p> <p>b. Myofascial</p> <p>c. Myofascial/perifascial</p> <p>d. Myotendinous</p>                                                                                                                                                                                                                                                                                    |     |

|                   |                                               |                                                       |                                                                                                                                                                                                                                                                                                                                                                                                                                                                                                                                                                                                                                                                                                                                                                                                                                            |     |
|-------------------|-----------------------------------------------|-------------------------------------------------------|--------------------------------------------------------------------------------------------------------------------------------------------------------------------------------------------------------------------------------------------------------------------------------------------------------------------------------------------------------------------------------------------------------------------------------------------------------------------------------------------------------------------------------------------------------------------------------------------------------------------------------------------------------------------------------------------------------------------------------------------------------------------------------------------------------------------------------------------|-----|
|                   |                                               |                                                       | <b>e. Combined</b>                                                                                                                                                                                                                                                                                                                                                                                                                                                                                                                                                                                                                                                                                                                                                                                                                         |     |
|                   |                                               | <i>Graded (Muscle) based on MRI and US appearance</i> | <p><b>Grade I (strain):</b><br/>MRI: Less than 5% of fibre disruption; feathery oedema, intramuscular high signal on fluid-sensitive sequences.<br/>US: Normal appearance, focal or general increased echogenicity with no architectural distortion.</p> <p><b>Grade II (Partial tear):</b><br/>MRI: Oedema and haemorrhage of the muscle or musculotendinous junction, may extend along fascial planes between muscle groups. Fibres, disorganised and thin, surrounded by haematoma and perifascial fluid.<br/>US: Discontinuous muscle fibres, disruption site is hyper-vascularised and altered in echogenicity, no perimyseal striation adjacent to the MTJ.</p> <p><b>Grade III (Complete tear):</b><br/>MRI: Complete discontinuity of muscle fibres, haematoma and retraction of the muscle ends.<br/>US: Comparable with MRI.</p> | Nil |
|                   |                                               |                                                       |                                                                                                                                                                                                                                                                                                                                                                                                                                                                                                                                                                                                                                                                                                                                                                                                                                            |     |
| Lee J, et al.(68) | Imaging of muscle injury in the elite athlete | <i>Classification based on mechanism of injury</i>    | <p><b>Direct injury</b><br/><b>Indirect injury</b><br/>Excessive eccentric load</p>                                                                                                                                                                                                                                                                                                                                                                                                                                                                                                                                                                                                                                                                                                                                                        | Nil |
|                   |                                               | <i>Grading based on clinical appearance</i>           | <p><b>Grade I (stretch injury):</b> Small tear, &lt; 5% loss of function<br/><b>Grade II (partial tear):</b> Larger tear, 5-50% loss of function<br/><b>Grade III (complete tear):</b> &gt;50% loss of function</p>                                                                                                                                                                                                                                                                                                                                                                                                                                                                                                                                                                                                                        |     |
|                   |                                               | <i>Grading based on US findings</i>                   | Modified "Peetrons"                                                                                                                                                                                                                                                                                                                                                                                                                                                                                                                                                                                                                                                                                                                                                                                                                        |     |
|                   |                                               | <i>Grading based on MRI findings</i>                  | <p><b>Grade I Strain:</b> Increased signal on fluid sensitive fat suppressed sequences, feathery pattern. No significant disruption of muscle architecture (&lt;5% cross sectional area). Perifascial fluid may be seen.<br/><b>Grade II Strain:</b> Distortion of normal muscle architecture. Haematoma formation at the musculo-tendinous junction. Feathery muscle oedema. May be laxity of the central tendon within the muscle.<br/><b>Grade III Strain:</b> Complete disruption of the musculo-tendinous unit with haematoma<br/><b>Grade IIIb:</b> Bony avulsion.<br/><b>Delayed onset muscle soreness:</b> Clinically distinct presentation, similar MRI to grade I injury, typically affecting more than one muscle.</p>                                                                                                          |     |

|                                          |                                                                                                                                              |                                                                                                          |                                                                                                                                                                                                                                                                                                                                                                                                                                                                                                                                                                                                                                                  |     |
|------------------------------------------|----------------------------------------------------------------------------------------------------------------------------------------------|----------------------------------------------------------------------------------------------------------|--------------------------------------------------------------------------------------------------------------------------------------------------------------------------------------------------------------------------------------------------------------------------------------------------------------------------------------------------------------------------------------------------------------------------------------------------------------------------------------------------------------------------------------------------------------------------------------------------------------------------------------------------|-----|
|                                          |                                                                                                                                              |                                                                                                          |                                                                                                                                                                                                                                                                                                                                                                                                                                                                                                                                                                                                                                                  |     |
| <b>Mueller-Wohlfahrt H-W, et al.(69)</b> | Terminology and classification of muscle injuries in sport: The Munich consensus statement                                                   | <i>Classification based on underlying pathology, mechanism of injury, imaging and clinical findings.</i> | <b>Indirect Muscle Disorder/Injury:</b><br><b>Functional Muscle Injury</b><br><b>Type 1: Overexertion related muscle disorder</b><br><b>1A:</b> Fatigue induced muscle disorder<br><b>1B:</b> Delayed onset muscle soreness<br><b>Type 2: Neuromuscular muscle disorder</b><br><b>2A:</b> Spine related neuromuscular Muscle Disorder<br><b>2B:</b> Muscle-related neuromuscular Muscle disorder<br><br><b>Indirect Muscle Disorder/Injury:</b><br><b>Structural Muscle Injury</b><br><b>Type 3:</b> Partial Muscle Tear<br><b>Type 4:</b> (Sub) total Muscle Tear);<br><br><b>Direct Muscle Injury</b><br><b>Laceration</b><br><b>Contusion</b> | 393 |
| <b>Ekstrand J, et al.(70)</b>            | Return to play after thigh muscle injury in elite football players: implementation and validation of the Munich muscle injury classification | <i>Grading based on underlying pathology, imaging and clinical findings.</i>                             | <b>Type 3A:</b> Minor partial muscle Tear<br><b>Type 3B:</b> Moderate partial muscle tear<br><b>Type 4:</b> Subtotal; Complete muscle tear                                                                                                                                                                                                                                                                                                                                                                                                                                                                                                       |     |
| <b>Peterson et al.(71)</b>               | The Diagnostic and Prognostic Value of Ultrasonography in Soccer Players With Acute Hamstring Injuries                                       | <i>Description based on US finding</i>                                                                   | <b>Positive</b><br><b>Negative</b>                                                                                                                                                                                                                                                                                                                                                                                                                                                                                                                                                                                                               | 51  |
| <b>Pollock et al. (72)</b>               | British athletics muscle injury classification: A new grading system                                                                         | <i>Grading based on Clinical and Radiological findings.</i>                                              | <b>Grade 0a:</b> Focal neuromuscular injury; Normal MRI.<br><b>Grade 0b:</b> Generalised muscle soreness. MRI normal or consistent with DOMS. (+N = neural component).<br><b>Grade 1:</b> Small "tears". Pain during or after activity. Normal ROM at 24 hours, but pain with contraction. Normal strength and normal tendon on MRI. No muscle fibre disruption.<br><b>1a:</b> Injury extends from Fascia. < 10% cross section area. < 5cm Longitudinal length. Inter-muscular haematoma may be present.<br><b>1b:</b> Intra-muscular or musculotendon Junction involvement. <10% cross                                                          | 0   |

|  |  |  |                                                                                                                                                                                                                                                                                                                                                                                                                                                                                                                                                                                                                                                                                                                                                                                                                                                                                                                                                                                                                                                                                                                                                                                                                                                                                                                             |  |
|--|--|--|-----------------------------------------------------------------------------------------------------------------------------------------------------------------------------------------------------------------------------------------------------------------------------------------------------------------------------------------------------------------------------------------------------------------------------------------------------------------------------------------------------------------------------------------------------------------------------------------------------------------------------------------------------------------------------------------------------------------------------------------------------------------------------------------------------------------------------------------------------------------------------------------------------------------------------------------------------------------------------------------------------------------------------------------------------------------------------------------------------------------------------------------------------------------------------------------------------------------------------------------------------------------------------------------------------------------------------|--|
|  |  |  | <p>sectional area &lt;5cm longitudinal length.</p> <p><b>Grade 2:</b> Moderate “tears”. Pain during activity requiring cessation. Limited ROM at 24 hours and reduced strength. Less than 5cm fibre disruption.</p> <p><b>2a:</b> Injury extends from peripheral fascia into muscle. 10-50% cross sectional area. 5-15 cm length.</p> <p><b>2b:</b> Intramuscular or musculo-tendon junction injury. 10-50% cross sectional area. 5-15 cm length.</p> <p><b>2c:</b> Injury extends into tendon but &lt; 5cm longitudinal involvement; &lt; 50% cross sectional area of tendon involved.</p> <p><b>Grade 3:</b> Extensive tear to muscle. Sudden pain; falls to ground. Significant loss of ROM and pain walking at 24 hours.</p> <p><b>3a:</b> Myofascial: &gt;50% cross sectional area. &gt;15 cm longitudinal involvement. &gt;5cm fibre disruption.</p> <p><b>3b:</b> Muscular / Myotendinous: &gt;50% cross sectional area. &gt;15 cm longitudinal involvement. &gt;5cm fibre disruption.</p> <p><b>3c:</b> Intra-tendinous: tendon involvement &gt; 5cm or &gt; 50% of tendon cross sectional area.</p> <p><b>Grade 4:</b> Complete tears. Sudden onset of pain and limitation of activity. Palpable gap. May be less pain on contraction than in Grade 3 injury.</p> <p><b>4:</b> Muscle</p> <p><b>4c:</b> Tendon</p> |  |
|--|--|--|-----------------------------------------------------------------------------------------------------------------------------------------------------------------------------------------------------------------------------------------------------------------------------------------------------------------------------------------------------------------------------------------------------------------------------------------------------------------------------------------------------------------------------------------------------------------------------------------------------------------------------------------------------------------------------------------------------------------------------------------------------------------------------------------------------------------------------------------------------------------------------------------------------------------------------------------------------------------------------------------------------------------------------------------------------------------------------------------------------------------------------------------------------------------------------------------------------------------------------------------------------------------------------------------------------------------------------|--|

### Supplementary Table One References

1. Marsh H. Clinical Lecture on Displacements and Injuries of Muscles and Tendons. *BMJ* 1896;July 25:181-186.
2. Crowley DD. Suturing of Muscle and Tendons. *California State J Medicine* 1902:48-54.
3. Heald CB. Injuries in Sport: A General Guide for the Practitioner. First Edition. London: Oxford University Press; 1931.
4. Gilcreest E. Ruptures and Tears of Muscles and Tendons of the Lower Extremity. Report of Fifteen Cases. *JAMA* 1933;100(3):154-160.
5. Smart M. The Principles of Treatment of Muscles and Joints by Graduated Muscular Contractions. First Edition. London: Oxford Medical Publications; 1933.

6. McMaster PE. Tendon and Muscle Ruptures. Clinical and Experimental Studies on the Causes and Location of Subcutaneous Ruptures. *JBJS* 1933;705-722.
7. Haldeman K, Soto-Hall R. Injuries to muscles and tendons. *JAMA* 1935;104(26):2319-2324.
8. Lloyd F, Deaver G, Eastwood F. Safety in Athletics: The Prevention and Treatment of Athletic Injuries. First edition. Philadelphia: W. B. Saunders Company; 1937.
9. Thorndike A. Athletic Injuries: Prevention, Diagnosis and Treatment. First Edition. Philadelphia: Lea and Febiger; 1938.
10. Jarvis WD. A Medical Handbook for Athletic and Football Club Trainers. First edition. London: Faber and Faber Ltd; 1949.
11. Featherstone D. Sports Injuries. First Edition. Bristol: John Wright and Sons Ltd; 1957.
12. Anzel SH, Covey KW, Weiner AD, Lipscomb PR. Disruption of Muscles and Tendons. An Analysis of 1,014 Cases. *Surgery* 1959;45(3):406-414.
13. Colson J. Strapping and Bandaging for Football Injuries. 1960 Edition. London: The Football Association; 1953.
14. Page E. Athletic Injuries and Their Treatment. London: Arco Publications; 1962.
15. Williams JGP. Sports Medicine. First Edition. Baltimore: The Williams and Wilkins Company; 1962.
16. O'Donoghue DH. Treatment of Injuries to Athletes. First Edition. Philadelphia: W.B. Saunders Company; 1962.
17. Tucker WE, Armstrong JR. Injury in Sport: The Physiology, Prevention and Treatment of Injuries associated with Sport. First Edition. London: Staples Press; 1964.
18. Rachun A. Standard Nomenclature of Athletic Injuries. First Edition. Chicago, Illinois: American Medical Association; 1966.
19. Bass AL. Rehabilitation After Soft Tissue Injury. *Br J Sports Med* 1966:162-172.
20. Hirata IJ. The Doctor and the Athlete. First Edition. Philadelphia: J.B. Lippincott Company; 1968.
21. Ryan A. Quadriceps strain, rupture and charlie horse. *Med Sci Sports* 1969;1(2):106-111.
22. Wise DD. Physiotherapeutic Treatment of Athletic Injuries to the Muscle-Tendon Complex of the Leg. *Canadian Med Association Journal* 1977;117:635-639.
23. Tietjen R. Closed Injuries of the Pectoralis Major Muscle. *J Trauma* 1980;20(3):262-264.

24. Oakes BW. Hamstring muscle injuries. *Aust Fam Physician* 1984;13(8):587-91.
25. Renstrom P. Muscle Injuries in Sports. In: Ljungqvist A, Peltokallio P, Tikkanen H, editors. Sports Medicine in Track and Field Athletics. Kouvola, Finland: IAAF; 1985. p. 17-28.
26. Safran MR, Garrett WE, Jr., Seaber AV, et al. The role of warmup in muscular injury prevention. *Am J Sports Med* 1988;16(2):123-9.
27. De Smet AA, Fisher DR, Heiner JP, et al. Magnetic resonance imaging of muscle tears. *Skeletal Radiol* 1990;19(4):283-6.
28. Peetrons P. Ultrasound of muscles. *Eur Radiol* 2002;12(1):35-43.
29. Peetrons P, Creteur P. Echographies et traumatismes musculaires aigus. In: Chevrot A, Kahn M, Morvan G, editors. Imagerie Des Parties Molles De L'Appareil Locomoteur: Sauramps Medical; 1993. p. 229-235.
30. Pomeranz SJ, Heidt RS, Jr. MR imaging in the prognostication of hamstring injury. Work in progress. *Radiology* 1993;189(3):897-900.
31. Takebayashi S, Takasawa H, Banzai Y, et al. Sonographic findings in muscle strain injury: clinical and MR imaging correlation. *J Ultrasound Med* 1995;14(12):899-905.
32. Rubin SJ, Feldman F, Staron RB, et al. Magnetic resonance imaging of muscle injury. *Clin Imaging* 1995;19(4):263-9.
33. Connell D, Potter H, Sherman M, et al. Injuries of the Pectoralis Major Muscle: Evaluation with MR Imaging. *Radiology* 1999;210:785-791.
34. De Smet AA, Best TM. MR Imaging of the Distribution and Location of Acute Hamstring Injuries in Athletes. *Am J Roentgenol* 2000;174:393-399.
35. Jarvinen T, Kaariainen M, Jarvinen M, et al. Muscle strain injuries. *Current Opinion in Rheumatology* 2000;12:155-161.
36. Carrino J, Chandnani V, Mitchell D, et al. Pectoralis major muscle and tendon tears: diagnosis and grading using magnetic resonance imaging. *Skeletal Radiology* 2000;29:305-313.
37. Verrall GM, Slavotinek JP, Barnes PG, et al. Clinical risk factors for hamstring muscle strain injury: a prospective study with correlation of injury by magnetic resonance imaging. *Br J Sports Med* 2001;35(6):435-9.
38. Slavotinek JP, Verrall GM, Fon GT. Hamstring Injury in Athletes: Using MR Imaging Measurements to Compare Extent of Muscle Injury with Amount of Time Lost from Competition. *Am J Radiology* 2002;179:1621-1628.

39. Verrall GM, Slavotinek JP, Barnes PG, et al. Diagnostic and prognostic value of clinical findings in 83 athletes with posterior thigh injury: comparison of clinical findings with magnetic resonance imaging documentation of hamstring muscle strain. *Am J Sports Med* 2003;31(6):969-73.
40. Stoller D, Tirman P, Bredella M, et al. *Diagnostic Imaging: Orthopaedics*. Salt Lake City: Amirsys; 2004.
41. Blankenbaker D, De Smet A. MR imaging of muscle injuries. *Applied Radiol* 2004;33(4):14-26.
42. Lee J, Healey J. Sonography of lower limb muscle injury. *Am J Roentgenol* 2004;182:341-351.
43. Connell DA, Schneider-Kolsky ME, Hoving JL, et al. Longitudinal study comparing sonographic and MRI assessments of acute and healing hamstring injuries. *Am J Roentgenol* 2004;183(4):975-84.
44. Gibbs NJ, Cross TM, Cameron M, et al. The accuracy of MRI in predicting recovery and recurrence of acute grade one hamstring muscle strains within the same season in Australian Rules football players. *J Sci Med Sport* 2004;7(2):248-58.
45. Cross T, Gibbs N, Houang M, Cameron M. Acute Quadriceps Muscle Strains. Magnetic Resonance Imaging Features and Prognosis. *Am J Sports Med* 2004;32:710-719.
46. Rehman A, Robinson P. Sonographic evaluation of injuries to the pectoralis muscles. *Am J Roentgenol* 2005;184(4):1205-11.
47. Askling C, Saartok T, Thorstensson A. Type of acute hamstring strain affects flexibility, strength, and time to return to pre-injury level. *Br J Sports Med* 2006;40(1):40-4.
48. Askling CM, Tengvar M, Saartok T, et al. Acute first-time hamstring strains during slow-speed stretching: clinical, magnetic resonance imaging, and recovery characteristics. *Am J Sports Med* 2007;35(10):1716-24.
49. Askling CM, Tengvar M, Saartok T, et al. Acute first-time hamstring strains during high-speed running: a longitudinal study including clinical and magnetic resonance imaging findings. *Am J Sports Med* 2007;35(2):197-206.
50. Askling CM, Tengvar M, Saartok T, et al. Proximal hamstring strains of stretching type in different sports: injury situations, clinical and magnetic resonance imaging characteristics, and return to sport. *Am J Sports Med* 2008;36(9):1799-804.
51. Schneider-Kolsky ME, Hoving JL, Warren P, et al. A Comparison Between Clinical Assessment and Magnetic Resonance Imaging of Acute Hamstring Injuries. *Am J Sports Med* 2006;34(6):1008-1015.



52. Verrall GM, Kalairajah Y, Slavotinek JP, et al. Assessment of player performance following return to sport after hamstring muscle strain injury. *J Sci Med Sport* 2006;9(1-2):87-90.
53. Maquirriain J, Ghisi J, Kokalj A. Rectus abdominis muscle strains in tennis players. *Br J Sports Med* 2007;41:842-848.
54. Koulouris G, Connell D, Brukner PD, et al. Magnetic Resonance Imaging Parameters for Assessing Risk of Recurrent Hamstring INjuries in Elite Athletes. *Am J Sports Med* 2007;35(9):1500-1506.
55. Wood D, Packham I, Trikha S, et al. Avulsion of the Proximal Hamstring Origin. *JBS* 2008;90:2365-2374.
56. Gyftopoulos S, Rosenberg Z, Schweitzer M, et al. Normal Anatomy and Strains of the Deep Musculotendinous Junction of the Proximal Rectus Femoris: MRI Features. *Am J Radiol* 2008;190:W182-W186.
57. Guerrero M, Guiu-Comadevall M, Cadefau JA, et al. Fast and slow myosins as markers of muscle injury. *Br J Sports Med* 2008;42(7):581-4.
58. Balius R, Maestro A, Pedret C, et al. Central aponeurosis tears of the rectus femoris: practical sonographic prognosis. *Br J Sports Med* 2009;43(11):818-24.
59. Hancock C, Sanders T, Zlatkin M, et al. Flexor femoris muscle complex: grading systems used to describe the complete spectrum of injury. *Clinical Imaging* 2009;33:130-135.
60. Dixon J. Gastrocnemius vs. soleus strain: how to differentiate and deal with calf muscle injuries. *Current Reviews in Musculoskeletal Medicine* 2009;2:74-77.
61. Rodas G, Pruna R, Til L, et al. Clinical Practice Guide for muscular injuries. Epidemiology, diagnosis, treatment and prevention. *Apunts Med Esport* 2009;64:179-203.
62. Malliaropoulos N, Isinkaye T, Tsitas K, et al. Reinjury after acute posterior thigh muscle injuries in elite track and field athletes. *Am J Sports Med* 2011;39(2):304-10.
63. Malliaropoulos N, Papacostas E, Kiritsi O, et al. Posterior Thigh Muscle Injuries in Elite Track and Field Athletes. *Am J Sports Med* 2010;38:1813-1819.

64. Cohen SB, Towers JD, Zoga A, et al. Hamstring injuries in professional football players: magnetic resonance imaging correlation with return to play. *Sports Health* 2011;3(5):423-30.
65. Ekstrand J, Healy JC, Walden M, et al. Hamstring muscle injuries in professional football: the correlation of MRI findings with return to play. *Br J Sports Med* 2012;46:112-117.
66. Comin J, Malliaras P, Baquie P, et al. Return to competitive play after hamstring injuries involving disruption of the central tendon. *Am J Sports Med* 2013;41(1):111-5.
67. Chan O, Del Buono A, Best T, et al. Acute muscle strain injuries: a proposed new classification system. *Knee Surgery, Sports Traumatol, Arthroscopy* 2012;20:2356-2362.
68. Lee J, Mitchell A, Healy J. Imaging of muscle injury in the elite athlete. *Br J Radiol* 2012;85(1016):1173-1185.
69. Mueller-Wohlfahrt H-W, Haensel L, Mithoefer K, et al. Terminology and classification of muscle injuries in sport: The Munich consensus statement. *Br J Sports Med* 2013;47(6):342-350.
70. Ekstrand J, Askling C, Magnusson H, et al. Return to play after thigh muscle injury in elite football players: implementation and validation of the Munich muscle injury classification. *Br J Sports Med* 2013;47(12):769-74.
71. Peterson J, Thorborg K, Nielsen M, et al. The Diagnostic and Prognostic Value of Ultrasonography in Soccer Players With Acute Hamstring Injuries. *Am J Sports Medicine* 2014;42(2):399-404.
72. Pollock N, James S, Lee J, et al. British athletics muscle injury classification: A new grading system. *Br J Sports Med* 48 (18): 1347-1351.
